# Supplementary material for: Acetate correlates with disability and immune response in multiple sclerosis
Source: PubMed Central journal article supplement (PMC7676361; doi:10.7717/peerj.10220), 2020-11-16
Supplement: peerj-08-10220-s002.pdf [file peerj-08-10220-s002.pdf]

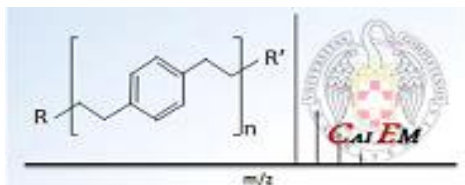

**RESULTADOS**

|                                                                             |                                             |
|-----------------------------------------------------------------------------|---------------------------------------------|
| Identificación del Cliente                                                  | Técnico Responsable                         |
| <b>Usuario (IP): Roberto Álvarez Lafuente</b>                               | <b>Estefanía García/ Cristina Gutiérrez</b> |
| <b>Facultad de Óptica</b>                                                   |                                             |
| <b>Departamento: Bioquímica</b>                                             | Fecha análisis: <b>26/09/17-29/09/17</b>    |
| <b>Universidad Complutense de Madrid</b>                                    |                                             |
| Número de solicitud de servicio: <b>17-495;17-496;17-501</b>                |                                             |
| Fecha de recepción de muestra/s: <b>26/09/17-28/09/17</b>                   |                                             |
| Código/s de muestra/s: 2017/EM/2109-2017/EM/2173; 2017/EM/2181-2017/EM/2194 |                                             |
| Referencia de los análisis: <b>Acetato, propionato, butirato</b>            |                                             |
| Tipo de análisis: <b>Análisis Cuantitativo mediante MRM (LC-QQQ-MS)</b>     |                                             |

**Analytical Conditions**

- Injection volume: 10  $\mu$ L
- Gradient mode: 20% phase B for 2 min, to 40% phase B to 7 min; from 40 to 100 % phase B till 7.5 min; Return to initial conditions from 8-9 min
- Phase A: H<sub>2</sub>O + 0.01% FA  
Phase B: Acetonitrile + 0.01% FA
- Flow: 0.6 mL/min
- Run time: 10 min
- MRM Transitions

**Acetate**

Quantifier (m/z): 194.0 >152.1(CE:18 V)

Qualifier (m/z): 194.0 >137.05 (CE: 21 V)

**Propionate**

Quantifier (m/z): 208.2 >137.05(CE:20 V)

Qualifier (m/z): 208.2 >165.15 (CE: 15 V)

**Butyrate**

Quantifier (m/z): 222.1 >137.00 (CE:20 V)

Qualifier (m/z): 222.1 >152.05 (CE: 16 V)

- Column: Phenomenex Gemini 5u C18 110 A 150x2mm

## **Standard preparation**

The standard mix with 500 mg/L of acetic, propionic and butyric acid (sigma) was prepared in acetonitrile:water (1:1) solution. Derivatization was carried out mixing 40  $\mu\text{L}$  of standard mix with 20  $\mu\text{L}$  of 200 mM 3-NPH and 20  $\mu\text{L}$  of 120 mM EDC in 6% pyridine. The incubation time was 30 min and 40 °C. Then samples were dissolved in 1920  $\mu\text{L}$  of 10% acetonitrile and diluted in 1:1 ratio with ACN:H<sub>2</sub>O (1:1). Finally samples were filtered with 0.22  $\mu\text{m}$  PTFE filters and analyze by LC-ESI-QQQ 8030 Shimadzu mass spectrometer.

3-NPH: 3-Nitrophenylhydrazine hydrochloride

EDC: N-(3-dimethylaminopropyl)-N'-ethylcarbodiimide hydrochloride

## **Plasma sample preparation**

Proteins were precipitated with equal volume of ACN:H<sub>2</sub>O (1:1). After 10 minutes of centrifugation, at 4 °C, derivatization was carried out mixing 40  $\mu\text{L}$  of samples with 20  $\mu\text{L}$  of 3-NPH and 20  $\mu\text{L}$  of 120 mM EDC in 6% pyridine. The incubation time was 30 min and 40 °C. Then samples were diluted with 920  $\mu\text{L}$  of 10% acetonitrile. Finally samples were filtered with 0.22  $\mu\text{m}$  PTFE filters and analyze by LC-ESI-QQQ 8030 Shimadzu mass spectrometer.

## Results

| Sample name | Acetate<br>Concentration<br>( $\mu\text{mol/L}$ ) | Propionate<br>Concentration<br>( $\mu\text{mol/L}$ ) | Butyrate<br>Concentration<br>( $\mu\text{mol/L}$ ) |
|-------------|---------------------------------------------------|------------------------------------------------------|----------------------------------------------------|
| 11440       | 27,9                                              | 4,2                                                  | 5,1                                                |
| 11444       | 29,5                                              | 5,5                                                  | 4,7                                                |
| 11597       | 30,6                                              | ND                                                   | 3,0                                                |
| 11604       | 24,7                                              | ND                                                   | ND                                                 |
| 11906       | 29,6                                              | 7,3                                                  | ND                                                 |
| 11907       | 31,1                                              | 7,1                                                  | 3,2                                                |
| 11918       | 22,8                                              | 6,3                                                  | 4,4                                                |
| 11929       | 32,9                                              | 6,8                                                  | 5,2                                                |
| 1           | 63,2                                              | 7,6                                                  | 9,1                                                |
| 2           | 26,5                                              | 4,4                                                  | 3,4                                                |
| 3           | 72,4                                              | 8,7                                                  | 6,6                                                |
| 4           | 52,8                                              | 5,7                                                  | 4,5                                                |
| 5           | 49,2                                              | 5,0                                                  | 4,8                                                |
| 6           | 53,8                                              | 9,2                                                  | 5,1                                                |
| 7           | 157,8                                             | 5,9                                                  | 4,7                                                |
| 8           | 49,1                                              | 3,7                                                  | 4,5                                                |
| 9           | 49,4                                              | 5,6                                                  | 6,2                                                |
| 10          | 49,1                                              | 3,9                                                  | 4,3                                                |
| 11          | 384,3                                             | 15,4                                                 | 9,3                                                |
| 12          | 46,3                                              | 6,4                                                  | 5,5                                                |
| 13          | 38,8                                              | 5,5                                                  | 4,5                                                |
| 14          | 64,7                                              | 6,6                                                  | 8,9                                                |
| 15          | 57,6                                              | 8,1                                                  | 8,1                                                |
| 16          | 15,1                                              | 3,1                                                  | 3,1                                                |
| 17          | 26,1                                              | 5,9                                                  | 6,1                                                |
| 18          | 23,4                                              | 3,6                                                  | 3,6                                                |
| 19          | 13,3                                              | 4,4                                                  | 4,4                                                |
| 20          | 21,9                                              | 4,3                                                  | 3,9                                                |
| 21          | 40,3                                              | 4,5                                                  | 4,9                                                |
| 22          | 34,4                                              | 3,8                                                  | 5,2                                                |
| 11714       | 25,0                                              | 6,1                                                  | ND                                                 |
| 11715       | 22,7                                              | 6,0                                                  | ND                                                 |
| 11728       | 18,1                                              | 6,3                                                  | 3,7                                                |
| 11620       | 33,8                                              | 5,0                                                  | 5,8                                                |
| 11591       | 24,4                                              | 4,1                                                  | 4,2                                                |
| 23          | 23,6                                              | 3,3                                                  | 2,9                                                |
| 24          | 27,1                                              | 3,5                                                  | 4,6                                                |
| 25          | 25,0                                              | 5,2                                                  | 5,1                                                |
| 26          | 19,1                                              | 2,3                                                  | 4,2                                                |
| 27          | 46,7                                              | 4,7                                                  | 5,1                                                |
| 28          | 38,4                                              | 4,8                                                  | ND                                                 |
| 29          | 23,9                                              | 3,8                                                  | 2,2                                                |
| 30          | 21,0                                              | 2,3                                                  | ND                                                 |

|       |      |     |     |
|-------|------|-----|-----|
| 31    | 17,2 | 2,5 | 3,0 |
| 32    | 22,4 | 2,8 | 3,2 |
| 33    | 23,9 | 2,7 | 3,5 |
| 34    | 27,9 | 3,6 | 4,1 |
| 35    | 34,9 | 3,3 | 4,0 |
| 36    | 30,8 | 3,5 | 5,3 |
| 37    | 51,0 | 3,3 | 5,2 |
| 38    | 30,3 | 4,9 | 3,0 |
| 39    | 31,3 | 3,4 | 4,5 |
| 40    | 38,3 | 3,7 | 3,2 |
| 41    | 32,7 | 2,7 | 2,5 |
| 42    | 30,3 | 3,7 | 4,3 |
| 43    | 24,4 | 3,5 | 3,0 |
| 44    | 16,7 | 2,8 | 3,2 |
| 45    | 17,0 | 2,9 | 3,2 |
| 46    | 21,0 | 2,8 | 3,5 |
| 47    | 32,5 | 4,1 | 4,4 |
| 11562 | 22,5 | ND  | 3,4 |
| 11564 | 24,3 | ND  | ND  |
| 11579 | 22,6 | ND  | 4,4 |
| 48    | 25,5 | ND  | 1,6 |
| 49    | 11,7 | ND  | ND  |
| 50    | 24,3 | ND  | ND  |
| 51    | 15,0 | 2,1 | ND  |
| 52    | 14,0 | 1,7 | ND  |
| 53    | 15,8 | 1,8 | 2,7 |
| 54    | 18,4 | 1,9 | 2,7 |
| 55    | 19,6 | 1,9 | 2,0 |
| 56    | 14,0 | 2,0 | 2,1 |
| 57    | 25,9 | 2,3 | 3,4 |
| 58    | 8,2  | 2,4 | 2,1 |
