# Supplementary material for: Acetate correlates with disability and immune response in multiple sclerosis
Source: PubMed Central journal article supplement (PMC7676361; doi:10.7717/peerj.10220), 2020-11-16
Supplement: peerj-08-10220-s003.pdf [file peerj-08-10220-s003.pdf]

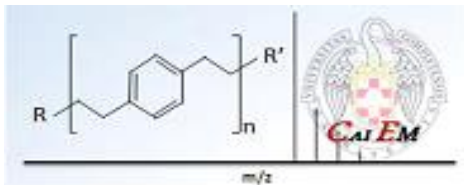

**RESULTADOS**

|                                                                                                        |                                             |
|--------------------------------------------------------------------------------------------------------|---------------------------------------------|
| Identificación del Cliente                                                                             | Técnico Responsable                         |
| <b>Usuario (IP): Roberto Álvarez Lafuente</b>                                                          | <b>Estefanía García/ Cristina Gutiérrez</b> |
| <b>Facultad de Óptica</b>                                                                              |                                             |
| <b>Departamento: Bioquímica</b>                                                                        | Fecha análisis: <b>25/05/17-09/06/17</b>    |
| <b>Universidad Complutense de Madrid</b>                                                               |                                             |
| Número de solicitud de servicio: <b>17-334;17-369;17-370;17-377</b>                                    |                                             |
| Fecha de recepción de muestra/s: <b>25/05/17; 05/06/17-09/06/17</b>                                    |                                             |
| Código/s de muestra/s: 2017/EM/1399-2017/EM/1407; 2017/EM/1526-2017/EM/1587; 2017/EM/1599-2017/EM/1628 |                                             |
| Referencia de los análisis: <b>Acetato, propionato, butirato</b>                                       |                                             |
| Tipo de análisis: <b>Análisis Cuantitativo mediante MRM (LC-QQQ-MS)</b>                                |                                             |

**Analytical Conditions**

- Injection volume: 10 µL
- Gradient mode: 20% phase B for 2 min, to 40% phase B to 7 min; from 40 to 100 % phase B till 7.5 min; Return to initial conditions from 8-9 min
- Phase A: H<sub>2</sub>O + 0.01% FA  
Phase B: Acetonitrile + 0.01% FA
- Flow: 0.6 mL/min
- Run time: 10 min
- MRM Transitions

**Acetate**

Quantifier (m/z): 194.0 >152.1(CE:18 V)

Qualifier (m/z): 194.0 >137.05 (CE: 21 V)

**Propionate**

Quantifier (m/z): 208.2 >137.05(CE:20 V)

Qualifier (m/z): 208.2 >165.15 (CE: 15 V)

**Butyrate**

Quantifier (m/z): 222.1 >137.00 (CE:20 V)

Qualifier (m/z): 222.1 >152.05 (CE: 16 V)

- Column: Phenomenex Gemini 5u C18 110 A 150x2mm

## Standard preparation

The standard mix with 500 mg/L of acetic, propionic and butyric acid (sigma) was prepared in acetonitrile:water (1:1) solution. Derivatization was carried out mixing 40  $\mu$ L of standard mix with 20  $\mu$ L of 200 mM 3-NPH and 20  $\mu$ L of 120 mM EDC in 6% pyridine. The incubation time was 30 min and 40  $^{\circ}$ C. Then samples were dissolved in 1920  $\mu$ L of 10% acetonitrile and diluted in 1:1 ratio with ACN:H<sub>2</sub>O (1:1). Finally samples were filtered with 0.22  $\mu$ m PTFE filters and analyze by LC-ESI-QQQ 8030 Shimadzu mass spectrometer.

3-NPH: 3-Nitrophenylhydrazine hydrochloride

EDC: N-(3-dimethylaminopropyl)-N'-ethylcarbodiimide hydrochloride

## Plasma sample preparation

Proteins were precipitated with equal volume of ACN:H<sub>2</sub>O (1:1). After 10 minutes of centrifugation, at 4  $^{\circ}$ C, derivatization was carried out mixing 40  $\mu$ L of samples with 20  $\mu$ L of 3-NPH and 20  $\mu$ L of 120 mM EDC in 6% pyridine. The incubation time was 30 min and 40  $^{\circ}$ C. Then samples were diluted with 920  $\mu$ L of 10% acetonitrile. Finally samples were filtered with 0.22  $\mu$ m PTFE filters and analyze by LC-ESI-QQQ 8030 Shimadzu mass spectrometer.

## Results

### Chromatogram of standard mix 50 $\mu$ g/L

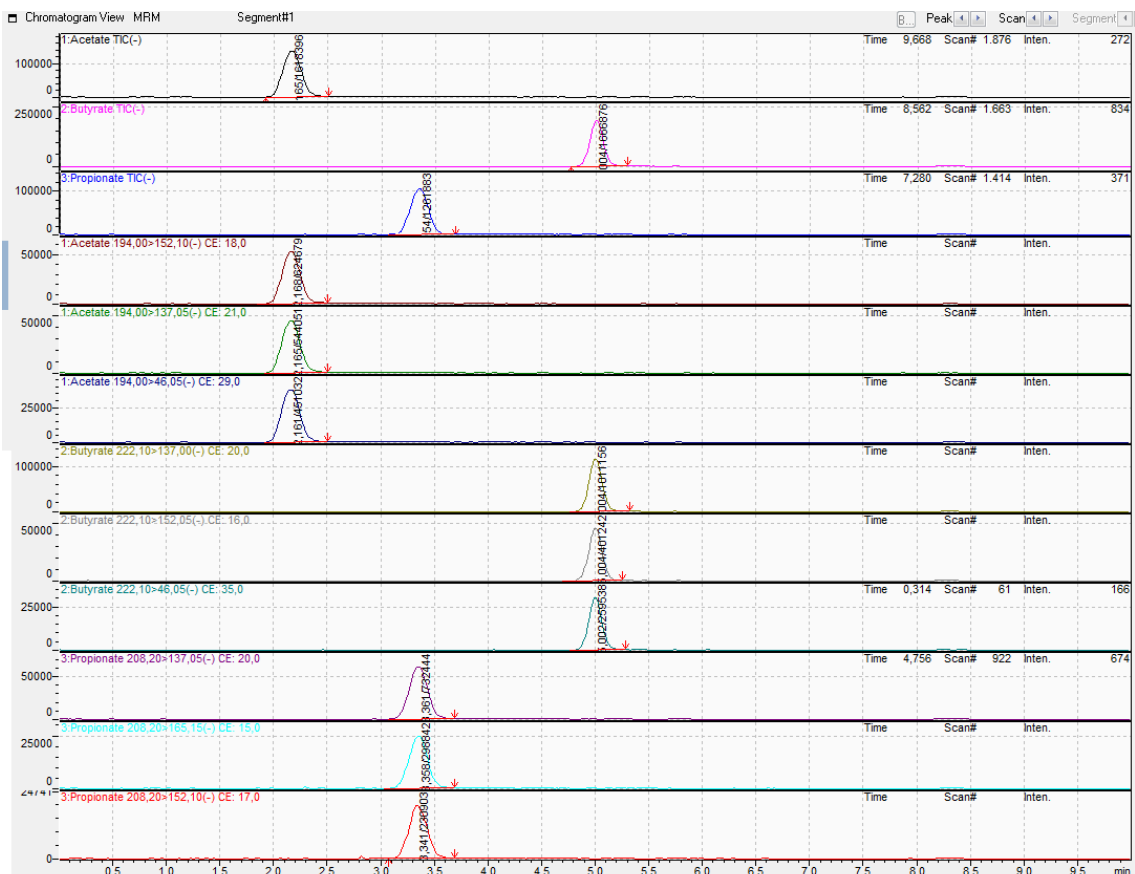

## Calibration curve

### Acetate

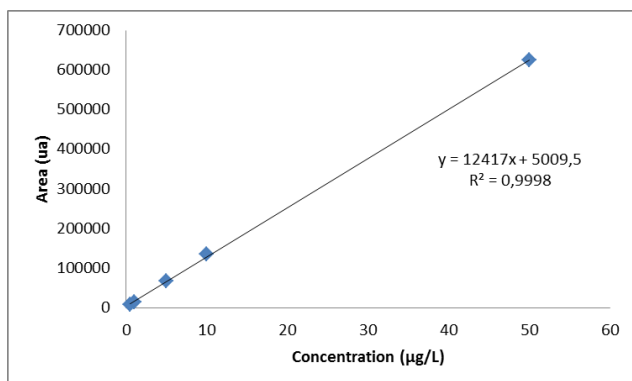

LD (detection limit) = 0.99 µg/L

LQ (quantification limit) = 3.29 µg/L

### Propionate

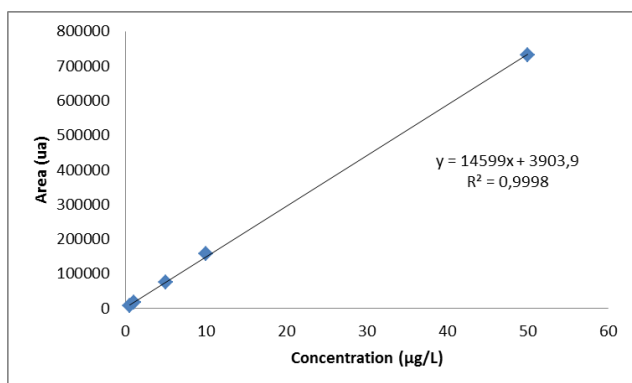

LD (detection limit) = 0.67 µg/L

LQ (quantification limit) = 2.24 µg/L

### Butyrate

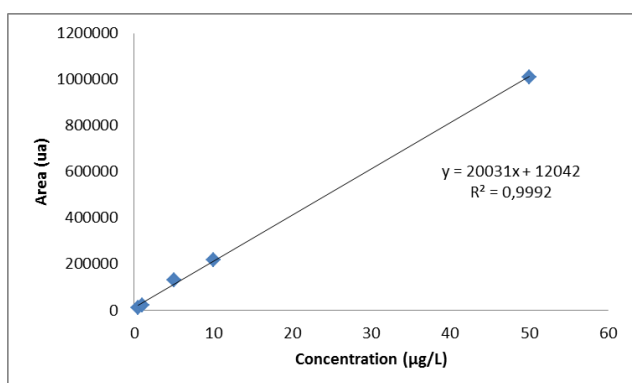

LD (detection limit) = 0.56 µg/L

LQ (quantification limit) = 1.86 µg/L

## Chromatogram sample 11719

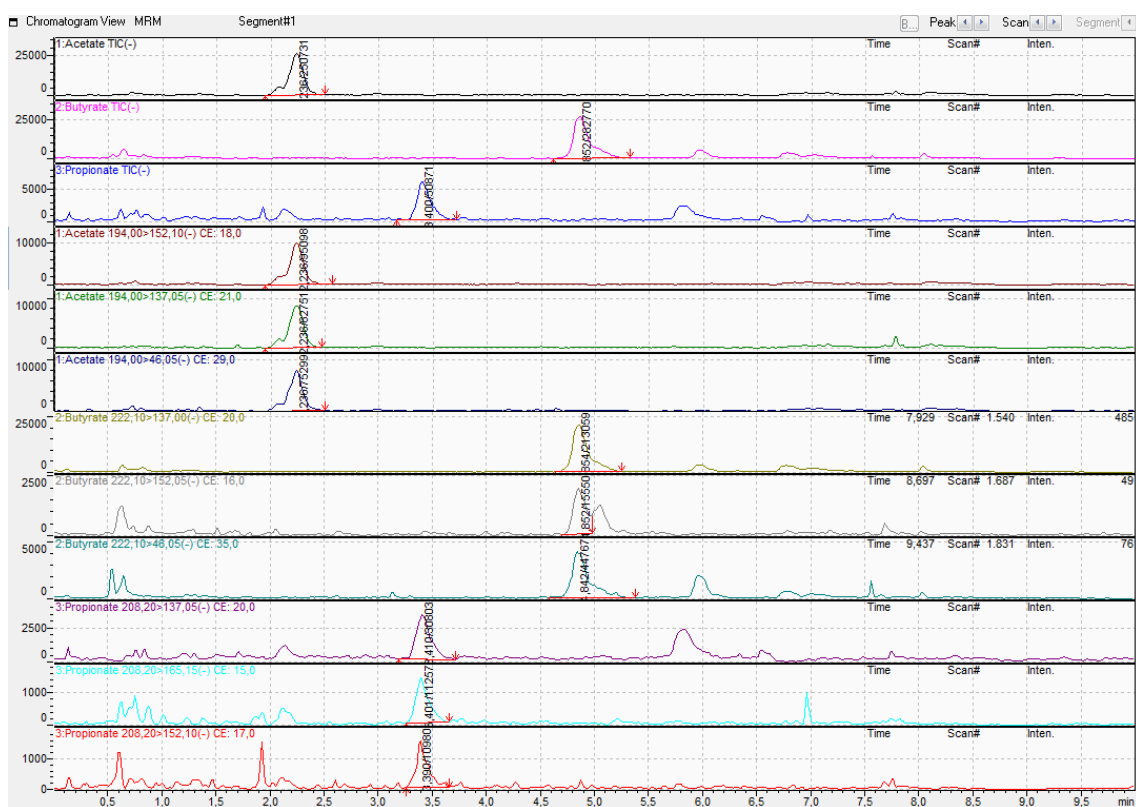

| Sample name | Acetate Concentration (µmol/L) | Propionate Concentration (µmol/L) | Butyrate Concentration (µmol/L) |
|-------------|--------------------------------|-----------------------------------|---------------------------------|
| 11121       | 9,8                            | 4,3                               | 2,3                             |
| 11720       | 51,8                           | 2,9                               | 2,3                             |
| 11719       | 18,7                           | 4,4                               | 2,4                             |
| 11690       | 15,6                           | 3,9                               | 1,8                             |
| 11726       | 12,8                           | 2,9                               | 3,8                             |
| 11697       | 14,2                           | 3,1                               | 1,7                             |
| 11700       | 18,2                           | 3,8                               | 1,5                             |
| 11687       | 11,7                           | 3,2                               | 2,3                             |
| 11689       | 13,5                           | 3,0                               | 1,6                             |
| 9379        | 19,6                           | 3,0                               | 1,8                             |
| 9790        | 17,1                           | 2,8                               | 0,0                             |
| 9094        | 21,5                           | 1,3                               | 1,4                             |
| 8814        | 13,3                           | 2,4                               | 2,3                             |
| 9636        | 16,6                           | 2,4                               | 1,7                             |
| 9771        | 15,2                           | 3,3                               | 2,0                             |
| 9585        | 25,0                           | 2,4                               | 2,5                             |
| 9043        | 15,8                           | 2,7                               | 0,4                             |
| 9471        | 12,4                           | 2,6                               | 1,6                             |
| 8684        | 25,2                           | 1,5                               | 0,5                             |
| 9391        | 19,2                           | 4,9                               | 1,7                             |
| 9801        | 12,7                           | 2,6                               | 0,9                             |

|       |      |      |     |
|-------|------|------|-----|
| 9386  | 35,2 | 3,9  | 2,4 |
| 9401  | 15,4 | 3,4  | 8,9 |
| 8896  | 14,9 | 4,8  | 4,2 |
| 9609  | 23,0 | 3,6  | 1,0 |
| 11701 | 16,5 | 4,6  | 5,0 |
| 11702 | 36,7 | 7,5  | 6,1 |
| 11703 | 16,0 | 2,0  | 0,0 |
| 11711 | 19,5 | 3,7  | 5,9 |
| 11716 | 22,2 | 4,4  | 3,8 |
| 11728 | 13,0 | 3,7  | 4,1 |
| 11729 | 20,5 | 3,5  | 4,3 |
| 11730 | 10,2 | 4,0  | 5,2 |
| 11731 | 14,4 | 2,7  | 7,2 |
| 9195  | 14,5 | 3,3  | 4,8 |
| 9457  | 26,1 | 3,0  | 8,2 |
| 9614  | 15,7 | 2,0  | 3,6 |
| 9772  | 55,5 | 9,1  | 1,9 |
| 10011 | 66,2 | 9,1  | 0,0 |
| 10121 | 51,2 | 7,5  | 1,7 |
| 10178 | 26,8 | 1,6  | 1,6 |
| 10179 | 31,0 | 1,9  | 0,0 |
| 8911  | 45,5 | 3,1  | 2,4 |
| 8982  | 22,2 | 2,6  | 0,0 |
| 9051  | 36,0 | 3,1  | 1,5 |
| 9059  | 24,0 | 2,2  | 0,0 |
| 9118  | 46,0 | 1,7  | 0,0 |
| 9660  | 27,2 | 3,6  | 0,0 |
| 9991  | 38,9 | 1,7  | 0,0 |
| 10519 | 29,0 | ND   | 0,0 |
| 11732 | 53,5 | 6,0  | 0,0 |
| 11734 | 29,6 | 5,7  | 0,0 |
| 11735 | 29,6 | 9,0  | 0,0 |
| 11738 | 19,1 | 8,5  | 4,6 |
| 11741 | 13,0 | 6,0  | 4,3 |
| 11743 | 15,8 | 7,8  | 6,2 |
| 11744 | 23,5 | 12,1 | 5,6 |
| 9676  | 31,5 | 10,6 | 5,6 |
| 10351 | 23,3 | 10,1 | 5,5 |
| 10416 | 19,3 | 5,0  | 3,7 |
| 10456 | 19,8 | 9,1  | 5,2 |
| 10546 | 21,2 | 7,9  | 5,8 |
| 10594 | 17,5 | 10,6 | 5,1 |
| 10952 | 33,3 | 14,9 | 7,3 |
| 11174 | 22,1 | 9,1  | 7,5 |
| 11183 | 19,7 | 7,1  | 4,5 |
| 9777  | 32,2 | 10,1 | 4,4 |
| 10738 | 29,1 | 13,0 | 7,5 |
| 1745  | 32,3 | 12,3 | 3,7 |
| 10968 | 34,7 | 11,2 | 4,8 |

|       |      |      |     |
|-------|------|------|-----|
| 11158 | 33,8 | 12,6 | 6,3 |
| 11173 | 22,3 | 8,1  | 5,8 |
| 11285 | 18,5 | 11,8 | 5,9 |
| 10859 | 22,7 | 11,8 | 6,8 |
| 11239 | 44,1 | 7,8  | 4,9 |
