# Supplementary material for: Acetate correlates with disability and immune response in multiple sclerosis
Source: PubMed Central journal article supplement (PMC7676361; doi:10.7717/peerj.10220), 2020-11-16
Supplement: peerj-08-10220-s006.pdf [file peerj-08-10220-s006.pdf]

## Results

| Sample name | Acetate<br>Concentration ( $\mu\text{M}$ ) | Propionate<br>Concentration ( $\mu\text{M}$ ) | Butyrate<br>Concentration ( $\mu\text{M}$ ) |
|-------------|--------------------------------------------|-----------------------------------------------|---------------------------------------------|
| 1           | 3,4                                        | 0,0                                           | 0,2                                         |
| 2           | 5,0                                        | 0,0                                           | 0,3                                         |
| 3           | 5,8                                        | 0,1                                           | 0,6                                         |
| 4           | 11,7                                       | 0,0                                           | 0,5                                         |
| 5           | 24,9                                       | 0,0                                           | 9,9                                         |
| 6           | 51,9                                       | 0,5                                           | 10,8                                        |
| 7           | 16,6                                       | 0,0                                           | 3,7                                         |
| 8           | 21,6                                       | 0,0                                           | 5,5                                         |
| 9           | 24,5                                       | 0,0                                           | 8,0                                         |
| 10          | 41,1                                       | 1,5                                           | 13,8                                        |
| 11          | 32,6                                       | 1,3                                           | 43,9                                        |
| 12          | 32,8                                       | 6,0                                           | 66,2                                        |
| 13          | 35,3                                       | 14,5                                          | 15,7                                        |
| 14          | 29,9                                       | 3,8                                           | 25,5                                        |
| 15          | 33,0                                       | 6,1                                           | 33,1                                        |
| 16          | 39,7                                       | 4,3                                           | 10,3                                        |
| 17          | 27,9                                       | 3,2                                           | 14,2                                        |
| 18          | 53,5                                       | 4,3                                           | 16,8                                        |
| 19          | 16,2                                       | 2,6                                           | 9,4                                         |
| 20          | 42,8                                       | 2,9                                           | 12,5                                        |
