# Supplementary material for: Acetate correlates with disability and immune response in multiple sclerosis
Source: PeerJ. 2020 Nov 16;8:e10220. doi: 10.7717/peerj.10220 (PMC7676361; doi:10.7717/peerj.10220)
Supplement: Supplemental Information 1 — Data used for the analyses performed and reported in this article. [file peerj-08-10220-s001.xlsx]

## Sheet: Hoja1
SAMPLE	AGE	GENDER	TYPE	TREATMENT	TREATMENT DURATION (months)	EDSS	MSSS	DISEASE DURATION (months)	ACETATE (μmol/l)	PROPIONATE (μmol/l)	BUTYRATE (μmol/l)	PROPIONATE/ ACETATE	BUTYRATE/ ACETATE	CD4+ T	CD4+ N	CD4+ CM	CD4+ EM	CD4+ TD	CD4+ IFN-γ+	CD4+ TNF-α+	CD4+ IL-17+	CD4+ GM-CSF+	CD8+ T	CD8+ N	CD8+ CM	CD8+ EM	CD8+ TD	CD8+ IFN-γ+	CD8+ TNF-α+	CD8+ IL-17+	CD8+ GM-CSF+	Treg	B CELLS	B MEM	PB	Breg	CD19+ TNF-α+	CD19+ GM-CSF+	NK	NKT	NKreg	MONOCYTES
1	37	FEMALE	MS	WITHOUT TREATMENT	-	6.5	6.62	216	63.2	7.6	9.1	0.120253	0.143987	66.39	-	-	-	-	-	-	-	-	16.99	-	-	-	-	-	-	-	-	-	-	-	0.86	-	-	-	-	-	-	-
2	42	FEMALE	MS	WITHOUT TREATMENT	-	6	6.33	180	26.5	4.4	3.4	0.166038	0.128302	52	-	-	-	-	-	-	-	-	17.4	-	-	-	-	-	-	-	-	-	-	-	0.56	-	-	-	-	-	-	-
3	54	MALE	MS	WITHOUT TREATMENT	-	7.5	8.54	186	72.4	8.7	6.6	0.120166	0.0911602	46.4	-	-	-	-	-	-	-	-	30.6	-	-	-	-	-	-	-	-	-	-	-	0.4	-	-	-	0.1	5.32	15.2	-
4	49	FEMALE	MS	WITHOUT TREATMENT	-	6	8.5	72	52.8	5.7	4.5	0.107955	0.0852273	52.9	-	-	-	-	-	-	-	-	19.2	-	-	-	-	-	-	-	-	3.9	-	-	0.9	-	-	-	1	0.9	9.4	-
5	43	FEMALE	MS	WITHOUT TREATMENT	-	7	7.24	300	49.2	5	4.8	0.101626	0.097561	32.3	-	-	-	-	-	-	-	-	-	-	-	-	-	-	-	-	-	-	-	-	-	-	-	-	0.3	2	-	3.5
6	51	FEMALE	MS	WITHOUT TREATMENT	-	6.5	5.61	426	53.8	9.2	5.1	0.171004	0.0947955	-	-	-	-	-	-	-	-	-	-	-	-	-	-	-	-	-	-	0.1	-	-	-	-	-	-	0.3	3.6	-	27.1
7	27	FEMALE	MS	WITHOUT TREATMENT	-	6	8.5	69	49.1	3.7	4.5	0.0753564	0.0916497	71.5	-	-	-	-	-	-	-	-	-	-	-	-	-	-	-	-	-	1.9	-	-	-	-	-	-	-	0.5	-	3.4
8	37	MALE	MS	WITHOUT TREATMENT	-	6	9.08	48	49.4	5.6	6.2	0.11336	0.125506	63.9	-	-	-	-	-	-	-	-	-	-	-	-	-	-	-	-	-	-	-	-	-	-	-	-	-	0	-	5.7
9	48	MALE	MS	WITHOUT TREATMENT	-	7	7.54	213	49.1	3.9	4.3	0.0794297	0.0875764	32.9	7.3	11.8	12.1	1.8	8.2	23.7	0.7	-	13.9	5.5	1.9	3	3.5	-	-	-	-	0.9	83.5	1.1	0.1	0.8	-	-	1.4	-	-	7.4
10	18	FEMALE	MS	WITHOUT TREATMENT	-	1.5	4.3	9	46.3	6.4	5.5	0.138229	0.11879	13.9	4.8	2	4.9	2.3	2.1	7.9	0.6	-	21.2	2.9	0.3	5	13	6.1	11.8	0.6	-	0.4	87.3	4.3	0.1	0.2	3.7	-	0.3	-	-	10.9
11	54	FEMALE	MS	WITHOUT TREATMENT	-	6.5	7.83	156	38.8	5.5	4.5	0.141753	0.115979	13.8	2.3	3.6	7	0.8	3.1	5.4	0.2	-	11.9	1.2	0.3	2.6	7.8	2.9	3.4	0.2	-	1.2	60.7	0.8	0.1	1.1	0.6	-	1.1	-	-	19.1
12	50	FEMALE	MS	WITHOUT TREATMENT	-	7.5	7.9	336	64.7	6.6	8.9	0.102009	0.137558	29.6	4.8	6.2	17.3	1.3	2.7	11.3	1.2	1.9	14.5	2.6	0.9	7.4	3.6	2.7	3.6	0.3	0.6	0.5	78.1	2.1	0.05	0.1	1.2	0.5	3.9	2.9	18.9	18
13	41	MALE	MS	WITHOUT TREATMENT	-	1	0.32	198	57.6	8.1	8.1	0.140625	0.140625	36.4	14.4	15	6.1	0.9	11.5	25.8	0.2	-	15.5	7.5	1.8	3	2.8	4.4	4.5	0.03	-	1.8	94.9	1.5	0.1	0.1	1.5	-	0.6	-	-	6.4
14	43	FEMALE	MS	WITHOUT TREATMENT	-	5	4.55	204	15.1	3.1	3.1	0.205298	0.205298	28.1	8.4	6.9	10.3	2.6	7.2	25.6	0.3	-	10.4	1.7	0.3	3.3	5.1	11.2	12.2	0.3	-	1.1	89.8	4.7	0.1	0.2	3.6	-	1.3	-	-	7.4
15	50	MALE	MS	WITHOUT TREATMENT	-	6	4.35	360	26.1	5.9	6.1	0.226054	0.233716	33.7	18.6	10	4.3	0.9	6.7	10	0.1	3.8	17.1	4.2	0.8	6	6.1	6.7	10	0.1	1.7	1.6	85.5	0.6	0.004	0.1	4	0.6	1.3	1.5	17.1	10.5
16	48	FEMALE	MS	WITHOUT TREATMENT	-	6.5	9.08	72	23.4	3.6	3.6	0.153846	0.153846	57.8	32	14.6	8.2	3	3.6	40	0.2	4.9	8.5	4.1	0.8	1.2	2.4	2.4	6	0.1	1.8	3.4	81.9	0.1	0.007	0.01	1.7	0.6	0.9	1.2	3.2	15
17	43	MALE	HD	-	-	-	-	-	13.3	4.4	4.4	0.330827	0.330827	52.9	38.8	11	2.1	1	2.1	18.3	0.1	0.4	5.9	1.6	0.2	1.1	3	3.9	11	0.1	0.4	1.7	-	-	-	-	0.1	0.1	-	-	-	16.6
18	36	MALE	HD	-	-	-	-	-	21.9	4.3	3.9	0.196347	0.178082	50.5	38.9	9.4	1.8	0.4	4.9	16.7	0.1	0.6	4.2	2.3	0.3	1.2	0.5	3.6	4.4	0.1	0.1	1.9	-	-	-	-	0.1	0.01	-	-	-	8.6
19	43	FEMALE	MS	WITHOUT TREATMENT	-	1.5	2.6	60	40.3	4.5	4.9	0.111663	0.121588	29.3	16.7	6.6	5.3	0.7	2.6	7.7	0.6	2.3	6.3	2.6	0.1	1	2.7	2.8	3	0.1	0.6	0.7	66.1	1.3	0.1	0.1	2.7	1.2	0.5	1.3	18.9	22.3
20	37	MALE	MS	WITHOUT TREATMENT	-	1.5	0.45	372	34.4	3.8	5.2	0.110465	0.151163	34.1	21.1	6.9	4.8	1.3	3.9	17.8	0.1	4.5	20.4	3	0.7	8.4	8.3	6.6	7.7	0.1	1.4	1	88.7	1.1	0.02	0.1	2.6	0.9	0.6	2.1	15.5	5.1
21	41	FEMALE	MS	WITHOUT TREATMENT	-	1.5	0.85	192	23.6	3.3	2.9	0.139831	0.122881	43.2	31.2	4.6	2.7	3.4	5.4	18.4	0.4	-	19.8	NV	NV	NV	NV	6.1	6.9	0.2	-	1.7	89.8	1.5	0.02	0.1	1.9	-	NV	-	-	12.8
22	32	FEMALE	HD	-	-	-	-	-	27.1	3.5	4.6	0.129151	0.169742	36.2	21.2	7.8	6.3	1	4.1	12.3	0.1	0.6	15.4	7.6	0.6	4.4	2.9	3.8	4.3	0.1	0.2	1.7	-	-	-	-	0.3	0.1	-	-	-	20.9
23	52	MALE	HD	-	-	-	-	-	25	5.2	5.1	0.208	0.204	34.4	12.5	14.6	4.8	2.6	7	31.5	0.4	0.4	15.2	3.9	0.4	1.4	9.5	6.6	10.3	0.4	0.3	3	-	-	-	-	0.3	0.05	-	-	-	18.5
24	32	FEMALE	HD	-	-	-	-	-	19.1	2.3	4.2	0.120419	0.219895	44	28.2	11.4	3.5	0.9	15.3	34.2	0.2	0.5	13.5	10.5	0.4	0.7	1.8	5.7	7.7	0.1	0.3	3	-	-	-	-	0.7	0.03	-	-	-	10.8
25	48	FEMALE	HD	-	-	-	-	-	46.7	4.7	5.1	0.100642	0.109208	37.7	22.9	7.3	5.1	2.4	0.1	1.4	0.3	0.4	14	8	0.4	1.7	4	0.4	1.1	0.6	0.6	2.6	-	-	-	-	0.1	0.05	-	-	-	22
26	56	MALE	HD	-	-	-	-	-	38.4	4.8	0	0.125	0	49.3	20.2	19.9	7.5	1.6	4.4	26.6	0.2	1.2	11.1	3.8	1.7	2.5	3	2.4	9.2	0.1	1.2	3.5	-	-	-	-	0.4	0.02	-	-	-	16.2
27	45	MALE	HD	-	-	-	-	-	23.9	3.8	2.2	0.158996	0.0920502	46.9	15.4	15	12.3	4.3	8.8	33.4	0.1	1.5	9.4	5.4	0.8	1.7	1.5	3.1	5.1	0.05	0.3	2.4	84.4	1.3	0.04	0.05	0.1	0.02	20.4	1.2	0.5	12.3
28	27	MALE	HD	-	-	-	-	-	21	2.3	0	0.109524	0	20.4	8.7	7.1	3.5	1.1	1.1	10.4	0.2	0.2	11.8	6.7	0.3	1.9	2.9	1	3.6	0.3	0.2	1.5	-	-	-	-	0.04	0.04	-	-	-	12.9
29	33	MALE	HD	-	-	-	-	-	17.2	2.5	3	0.145349	0.174419	31.3	10.3	13.2	6.9	0.9	2.6	13.1	0.2	0.3	21.5	2.9	1.3	13.3	4.1	7	9.8	0.4	0.4	2.2	-	-	-	-	0.1	0.05	-	-	-	14.5
30	34	MALE	HD	-	-	-	-	-	22.4	2.8	3.2	0.125	0.142857	29.1	13.3	10.5	4.7	0.6	7.5	18.2	0.1	0.7	9.9	5.4	0.4	1.8	2.2	4.1	5.3	0.2	0.4	2	-	-	-	-	0.5	0.1	-	-	-	13.1
31	47	FEMALE	MS	WITHOUT TREATMENT	-	1.5	1.53	120	23.9	2.7	3.5	0.112971	0.146444	35.5	18.9	8.2	6.6	1.9	4.4	26.8	0.4	3.2	10.1	3	1.1	3.5	2.3	5	11.3	0.1	2.7	1.9	71.7	0.4	0.02	0.01	4.2	0.3	0.6	1.9	10.7	30.5
32	38	FEMALE	MS	WITHOUT TREATMENT	-	1.5	4.3	12	27.9	3.6	4.1	0.129032	0.146953	53.2	17.4	15.9	16.7	3.1	11	29.5	1.2	7.9	13.4	1.5	0.4	3.1	8.5	13.8	14.7	0.4	2.4	2.6	82	0.8	0.027	0.004	3	0.8	0.9	1.6	10.1	11.9
33	39	FEMALE	MS	WITHOUT TREATMENT	-	1.5	1.28	144	34.9	3.3	4	0.0945559	0.114613	-	-	-	-	-	-	-	-	-	-	-	-	-	-	-	-	-	-	-	-	-	-	-	-	-	-	-	-	-
34	36	FEMALE	MS	WITHOUT TREATMENT	-	1.5	2.1	81	30.8	3.5	5.3	0.113636	0.172078	26.5	12.4	3.7	8.7	1.7	4.2	15	0.7	4.6	9.7	3.4	0.3	3.8	2.3	3.2	4.4	0.3	1.6	1	64.9	1.1	0.02	0.04	6.2	0.9	1	1.2	12.4	36.2
35	39	FEMALE	MS	WITHOUT TREATMENT	-	1.5	4.3	6.96	51	3.3	5.2	0.0647059	0.101961	34.9	18.5	6.3	6.5	3.6	8.8	25.8	0.6	5.9	15.3	4.4	0.5	3.9	6.6	6.6	7.6	0.1	1.4	2.4	81.1	0.9	0.1	0.02	2.9	0.6	0.6	4.9	13.8	18.4
36	49	FEMALE	MS	WITHOUT TREATMENT	-	1.5	0.66	216	30.3	4.9	3	0.161716	0.0990099	6.6	1.5	1.1	3	1.1	3.4	6.4	0.1	1.9	12	0.9	0.4	3.2	7.6	8.3	9.4	0.1	1.6	0.4	55.4	1.1	0.01	0.04	2.9	0.6	0.6	0.6	23.1	38.4
37	45	FEMALE	MS	WITHOUT TREATMENT	-	6	5.03	288	31.3	3.4	4.5	0.108626	0.14377	39.9	7	19.1	12.8	1	5.9	34.7	0.1	5.9	10.3	5.5	0.8	2.4	1.6	3.1	7.4	0.02	2.6	4.2	84.5	1	0.1	0.1	2.1	1.3	1.2	1	7.4	17.5
38	43	FEMALE	MS	WITHOUT TREATMENT	-	1	1.77	36	38.3	3.7	3.2	0.0966057	0.0835509	20	8.2	7.2	4	0.7	3.5	21.3	0.3	3.1	7.2	2.7	0.2	2.6	1.7	4.3	5.3	0.1	1.4	0.7	82.4	0.2	0.01	0.006	4	0.5	2.4	1.2	39.1	7.7
39	55	FEMALE	MS	WITHOUT TREATMENT	-	6.5	8.31	114	32.7	2.7	2.5	0.0825688	0.0764526	41.5	13.6	6.6	16.4	4.9	6.9	8.2	0.2	0.4	11.9	1.9	0.3	6.1	3.6	6.9	8.2	0.2	0.4	1.2	81.5	0.2	0.02	0.02	-	-	1	3.6	7.7	16.6
40	54	FEMALE	MS	WITHOUT TREATMENT	-	6.5	6.36	288	30.3	3.7	4.3	0.122112	0.141914	45.3	28.4	7.3	5.5	4	0.7	13.3	0.02	1.6	17.3	4.5	0.4	3	9.3	0.5	1.2	0.04	1	2.8	87.9	5.8	0.1	0.03	1.7	0.4	0.6	8.2	5.3	10.9
41	39	FEMALE	MS	WITHOUT TREATMENT	-	1	0.78	114	24.4	3.5	3	0.143443	0.122951	40.7	28.4	8.8	2.8	0.7	0.1	5.9	0.03	1.2	17	8.8	0.7	2.5	5	0.1	0.2	0.04	0.8	1.2	88.2	3.2	0.1	0.1	0.3	0.4	0.9	1.9	2.9	9.5
42	49	FEMALE	MS	WITHOUT TREATMENT	-	1.5	2.33	69	16.7	2.8	3.2	0.167665	0.191617	-	-	-	-	-	-	-	-	-	-	-	-	-	-	-	-	-	-	-	-	-	-	-	-	-	-	-	-	-
43	43	FEMALE	MS	WITHOUT TREATMENT	-	1	1.28	58.08	17	2.9	3.2	0.170588	0.188235	39.8	25.9	9.6	3.7	0.7	2.1	23.6	0.2	2.1	11.8	5.6	0.6	3	2.6	1.5	3.2	0.03	0.5	0.9	78.2	1.7	0.1	0.1	3.1	0.5	0.4	2.1	9.7	19.5
44	34	FEMALE	MS	WITHOUT TREATMENT	-	0	0.45	30	21	2.8	3.5	0.133333	0.166667	-	-	-	-	-	-	-	-	-	-	-	-	-	-	-	-	-	-	-	-	-	-	-	-	-	-	-	-	-
45	24	FEMALE	MS	WITHOUT TREATMENT	-	1	1.13	66	32.5	4.1	4.4	0.126154	0.135385	-	-	-	-	-	-	-	-	-	-	-	-	-	-	-	-	-	-	-	-	-	-	-	-	-	-	-	-	-
46	28	FEMALE	MS	WITHOUT TREATMENT	-	1	2.44	11.04	25.5	0	1.6	0	0.0627451	-	-	-	-	-	-	-	-	-	-	-	-	-	-	-	-	-	-	-	-	-	-	-	-	-	-	-	-	-
47	51	FEMALE	MS	WITHOUT TREATMENT	-	1	0.71	135	11.7	0	0	0	0	19.8	9.8	4.4	4.3	1.3	1.8	12.6	0.1	1.8	18.8	10.7	1.4	3	3.8	1.4	6.8	0.02	1.1	1	58.3	1.4	0.1	0.02	5.6	1.1	1.4	0.6	5.3	40.1
48	35	MALE	MS	WITHOUT TREATMENT	-	5	7.66	70.08	24.3	0	0	0	0	31.4	14.9	14	2.2	0.3	1.3	17.8	0.1	1.6	11.4	5.5	0.3	1.6	3.9	1.1	2.3	0.03	0.4	0.6	69.1	4.4	0.1	0.2	1.8	0.4	1	1.2	8.4	28.4
49	53	FEMALE	MS	WITHOUT TREATMENT	-	5	5.09	180	15	2.1	0	0.14	0	47.3	29.4	7.9	7	3	3.6	32.4	0.1	1.6	15.6	4.1	0.2	2.8	8.5	5.7	9.4	0.011	0.4	0.9	81.9	3.1	0.1	0.03	3	0.1	0.4	7.4	8.1	14.2
50	39	FEMALE	MS	WITHOUT TREATMENT	-	1	2.01	22.08	14	1.7	0	0.121429	0	-	-	-	-	-	-	-	-	-	-	-	-	-	-	-	-	-	-	-	-	-	-	-	-	-	-	-	-	-
51	41	MALE	MS	WITHOUT TREATMENT	-	6	7.65	106.08	15.8	1.8	2.7	0.113924	0.170886	49.6	28.7	12.3	6.6	2	2.5	30.8	0.2	3.2	8.7	4.2	0.3	1.3	2.9	3.2	2.4	0.03	0.4	1.5	89.5	2.5	0.2	0.1	5	0.5	0.6	2.3	6.6	7.1
52	59	MALE	MS	WITHOUT TREATMENT	-	0	0.67	6.96	18.4	1.9	2.7	0.103261	0.146739	46.8	27.4	13.4	4.9	1.1	5.3	7.6	0.02	0.9	10.8	2.6	1.5	2.2	4.4	5.3	7.6	0.02	0.9	1.2	81.4	3.4	0.04	0.1	7.4	0.6	0.6	4.2	4.3	14.4
53	44	MALE	MS	WITHOUT TREATMENT	-	1.5	1.53	123	19.6	1.9	2	0.0969388	0.102041	36.5	20.4	9.8	5.2	1.1	2.6	31.8	0.3	2.3	8.3	5.2	0.3	1.1	1.7	1.1	1.9	0.03	0.3	1.3	89	2.7	0.1	0.1	3.3	0.6	0.7	0.8	24	8.5
54	47	MALE	MS	WITHOUT TREATMENT	-	1.5	4.3	13.92	14	2	2.1	0.142857	0.15	44.1	16.6	12.1	11.9	3.5	7.6	14	0.02	2.9	14.3	2.6	1.4	4.2	6.1	7.6	14	0.02	2.9	2	82.4	3.6	0.1	0.2	7.8	0.4	0.3	3.9	9.8	16.6
55	42	FEMALE	MS	WITHOUT TREATMENT	-	1.5	1.92	96	25.9	2.3	3.4	0.0888031	0.131274	-	-	-	-	-	-	-	-	-	-	-	-	-	-	-	-	-	-	-	-	-	-	-	-	-	-	-	-	-
56	57	MALE	MS	WITHOUT TREATMENT	-	6	9.74	15.96	8.2	2.4	2.1	0.292683	0.256098	55	33.8	7.3	11.1	2.7	5.4	40.6	0.2	4	10.5	2	0.6	1.1	6.9	3.1	4	0.004	0.4	1.1	82.7	3.5	0.1	0.02	4.4	0.2	0.5	6.2	7.1	16
57	50	MALE	MS	IMMUNOSUPPRESSANT	10	6	7.39	131	25.2	1.5	0.5	0.0595238	0.0198413	-	-	-	-	-	-	-	-	-	-	-	-	-	-	-	-	-	-	-	-	-	-	-	-	-	-	-	-	-
58	46	FEMALE	MS	IMMUNOSUPPRESSANT	14	6	5.04	268	12.7	2.6	0.9	0.204724	0.0708661	-	-	-	-	-	-	-	-	-	-	-	-	-	-	-	-	-	-	-	-	-	-	-	-	-	-	-	-	-
59	29	MALE	MS	IMMUNOMODULATOR	53	0	0.35	59	13.3	2.4	2.3	0.180451	0.172932	-	-	-	-	-	-	-	-	-	-	-	-	-	-	-	-	-	-	-	-	-	-	-	-	-	-	-	-	-
60	30	FEMALE	MS	IMMUNOMODULATOR	32	0	0.45	39	14.9	4.8	4.2	0.322148	0.281879	-	-	-	-	-	-	-	-	-	-	-	-	-	-	-	-	-	-	-	-	-	-	-	-	-	-	-	-	-
61	39	FEMALE	MS	IMMUNOSUPPRESSANT	19	5.5	5.51	191	45.5	3.1	2.4	0.0681319	0.0527473	-	-	-	-	-	-	-	-	-	-	-	-	-	-	-	-	-	-	-	-	-	-	-	-	-	-	-	-	-
62	32	FEMALE	MS	IMMUNOSUPPRESSANT	21	5	6.5	118	22.2	2.6	0	0.117117	0	-	-	-	-	-	-	-	-	-	-	-	-	-	-	-	-	-	-	-	-	-	-	-	-	-	-	-	-	-
63	41	FEMALE	MS	IMMUNOSUPPRESSANT	3	6.5	8.15	140	15.8	2.7	0.4	0.170886	0.0253165	-	-	-	-	-	-	-	-	-	-	-	-	-	-	-	-	-	-	-	-	-	-	-	-	-	-	-	-	-
64	55	FEMALE	MS	IMMUNOSUPPRESSANT	11	6	6.56	172	36	3.1	1.5	0.0861111	0.0416667	-	-	-	-	-	-	-	-	-	-	-	-	-	-	-	-	-	-	-	-	-	-	-	-	-	-	-	-	-
65	43	MALE	MS	IMMUNOMODULATOR	34	6	8.5	80	24	2.2	0	0.0916667	0	-	-	-	-	-	-	-	-	-	-	-	-	-	-	-	-	-	-	-	-	-	-	-	-	-	-	-	-	-
66	25	MALE	MS	IMMUNOSUPPRESSANT	0	6	8.5	72	21.5	1.3	1.4	0.0604651	0.0651163	-	-	-	-	-	-	-	-	-	-	-	-	-	-	-	-	-	-	-	-	-	-	-	-	-	-	-	-	-
67	44	FEMALE	MS	IMMUNOMODULATOR	73	6	6.33	188	46	1.7	0	0.0369565	0	-	-	-	-	-	-	-	-	-	-	-	-	-	-	-	-	-	-	-	-	-	-	-	-	-	-	-	-	-
68	43	MALE	MS	IMMUNOMODULATOR	84	1	0.78	120	14.5	3.3	4.8	0.227586	0.331034	-	-	-	-	-	-	-	-	-	-	-	-	-	-	-	-	-	-	-	-	-	-	-	-	-	-	-	-	-
69	53	FEMALE	MS	IMMUNOMODULATOR	164	6.5	7.14	196	19.6	3	1.8	0.153061	0.0918367	-	-	-	-	-	-	-	-	-	-	-	-	-	-	-	-	-	-	-	-	-	-	-	-	-	-	-	-	-
70	59	MALE	MS	IMMUNOMODULATOR	162	6.5	7.14	203	35.2	3.9	2.4	0.110795	0.0681818	-	-	-	-	-	-	-	-	-	-	-	-	-	-	-	-	-	-	-	-	-	-	-	-	-	-	-	-	-
71	43	FEMALE	MS	IMMUNOMODULATOR	6	0	0.67	10	19.2	4.9	1.7	0.255208	0.0885417	-	-	-	-	-	-	-	-	-	-	-	-	-	-	-	-	-	-	-	-	-	-	-	-	-	-	-	-	-
72	42	FEMALE	MS	IMMUNOSUPPRESSANT	23	5	5.32	163	15.4	3.4	8.9	0.220779	0.577922	-	-	-	-	-	-	-	-	-	-	-	-	-	-	-	-	-	-	-	-	-	-	-	-	-	-	-	-	-
73	36	FEMALE	MS	IMMUNOMODULATOR	65	0	0.16	148	26.1	3	8.2	0.114943	0.314176	-	-	-	-	-	-	-	-	-	-	-	-	-	-	-	-	-	-	-	-	-	-	-	-	-	-	-	-	-
74	40	FEMALE	MS	IMMUNOMODULATOR	0	0	0.21	113	12.4	2.6	1.6	0.209677	0.129032	-	-	-	-	-	-	-	-	-	-	-	-	-	-	-	-	-	-	-	-	-	-	-	-	-	-	-	-	-
75	40	FEMALE	MS	IMMUNOSUPPRESSANT	14	5.5	7.32	103	27.2	3.6	0	0.132353	0	-	-	-	-	-	-	-	-	-	-	-	-	-	-	-	-	-	-	-	-	-	-	-	-	-	-	-	-	-
76	46	FEMALE	MS	IMMUNOMODULATOR	0	1	2.44	15	25	2.4	2.5	0.096	0.1	-	-	-	-	-	-	-	-	-	-	-	-	-	-	-	-	-	-	-	-	-	-	-	-	-	-	-	-	-
77	47	MALE	MS	IMMUNOMODULATOR	77	6	5.09	257	23	3.6	1	0.156522	0.0434783	-	-	-	-	-	-	-	-	-	-	-	-	-	-	-	-	-	-	-	-	-	-	-	-	-	-	-	-	-
78	40	MALE	MS	IMMUNOMODULATOR	75	0	0.21	105	15.7	2	3.6	0.127389	0.229299	-	-	-	-	-	-	-	-	-	-	-	-	-	-	-	-	-	-	-	-	-	-	-	-	-	-	-	-	-
79	29	FEMALE	MS	IMMUNOMODULATOR	65	1	1.28	71	16.6	2.4	1.7	0.144578	0.10241	-	-	-	-	-	-	-	-	-	-	-	-	-	-	-	-	-	-	-	-	-	-	-	-	-	-	-	-	-
80	41	FEMALE	MS	-	0	1	1.45	49	31.5	10.6	5.6	0.336508	0.177778	-	-	-	-	-	-	-	-	-	-	-	-	-	-	-	-	-	-	-	-	-	-	-	-	-	-	-	-	-
81	33	FEMALE	MS	IMMUNOMODULATOR	106	0	0.21	116	15.2	3.3	2	0.217105	0.131579	-	-	-	-	-	-	-	-	-	-	-	-	-	-	-	-	-	-	-	-	-	-	-	-	-	-	-	-	-
82	44	MALE	MS	IMMUNOMODULATOR	67	1	0.49	177	55.5	9.1	1.9	0.163964	0.0342342	-	-	-	-	-	-	-	-	-	-	-	-	-	-	-	-	-	-	-	-	-	-	-	-	-	-	-	-	-
83	65	FEMALE	MS	IMMUNOSUPPRESSANT	0	6.5	8.91	88	32.2	10.1	4.4	0.313665	0.136646	-	-	-	-	-	-	-	-	-	-	-	-	-	-	-	-	-	-	-	-	-	-	-	-	-	-	-	-	-
84	54	FEMALE	MS	IMMUNOMODULATOR	33	0	0.21	104	17.1	2.8	0	0.163743	0	-	-	-	-	-	-	-	-	-	-	-	-	-	-	-	-	-	-	-	-	-	-	-	-	-	-	-	-	-
85	58	MALE	MS	IMMUNOSUPPRESSANT	17	6	5.09	260	38.9	1.7	0	0.0437018	0	-	-	-	-	-	-	-	-	-	-	-	-	-	-	-	-	-	-	-	-	-	-	-	-	-	-	-	-	-
86	29	FEMALE	MS	IMMUNOMODULATOR	27	0	0.45	37	66.2	9.1	0	0.137462	0	-	-	-	-	-	-	-	-	-	-	-	-	-	-	-	-	-	-	-	-	-	-	-	-	-	-	-	-	-
87	43	FEMALE	MS	IMMUNOMODULATOR	96	1	0.78	128	51.2	7.5	1.7	0.146484	0.0332031	-	-	-	-	-	-	-	-	-	-	-	-	-	-	-	-	-	-	-	-	-	-	-	-	-	-	-	-	-
88	39	MALE	MS	IMMUNOMODULATOR	70	1	1.13	83	26.8	1.6	1.6	0.0597015	0.0597015	-	-	-	-	-	-	-	-	-	-	-	-	-	-	-	-	-	-	-	-	-	-	-	-	-	-	-	-	-
89	40	FEMALE	MS	IMMUNOMODULATOR	109	1	0.78	126	31	1.9	0	0.0612903	0	-	-	-	-	-	-	-	-	-	-	-	-	-	-	-	-	-	-	-	-	-	-	-	-	-	-	-	-	-
90	46	FEMALE	MS	IMMUNOMODULATOR	83	1	0.94	98	23.3	10.1	5.5	0.433476	0.236052	-	-	-	-	-	-	-	-	-	-	-	-	-	-	-	-	-	-	-	-	-	-	-	-	-	-	-	-	-
91	37	FEMALE	MS	IMMUNOSUPPRESSANT	3	1	1.04	86	19.3	5	3.7	0.259067	0.19171	-	-	-	-	-	-	-	-	-	-	-	-	-	-	-	-	-	-	-	-	-	-	-	-	-	-	-	-	-
92	44	MALE	MS	IMMUNOMODULATOR	100	0	0.17	135	19.8	9.1	5.2	0.459596	0.262626	-	-	-	-	-	-	-	-	-	-	-	-	-	-	-	-	-	-	-	-	-	-	-	-	-	-	-	-	-
93	48	FEMALE	MS	IMMUNOSUPPRESSANT	14	5	6.95	103	29	-	0	#VALUE!	0	-	-	-	-	-	-	-	-	-	-	-	-	-	-	-	-	-	-	-	-	-	-	-	-	-	-	-	-	-
94	43	FEMALE	MS	IMMUNOMODULATOR	65	0	0.25	74	21.2	7.9	5.8	0.372642	0.273585	-	-	-	-	-	-	-	-	-	-	-	-	-	-	-	-	-	-	-	-	-	-	-	-	-	-	-	-	-
95	26	MALE	MS	IMMUNOSUPPRESSANT	0	0	0.67	13	17.5	10.6	5.1	0.605714	0.291429	-	-	-	-	-	-	-	-	-	-	-	-	-	-	-	-	-	-	-	-	-	-	-	-	-	-	-	-	-
96	48	FEMALE	MS	IMMUNOMODULATOR	0	6	6.56	177	29.1	13	7.5	0.446735	0.257732	-	-	-	-	-	-	-	-	-	-	-	-	-	-	-	-	-	-	-	-	-	-	-	-	-	-	-	-	-
97	45	MALE	MS	IMMUNOMODULATOR	0	5	3.4	313	32.3	12.3	3.7	0.380805	0.114551	-	-	-	-	-	-	-	-	-	-	-	-	-	-	-	-	-	-	-	-	-	-	-	-	-	-	-	-	-
98	60	MALE	MS	IMMUNOMODULATOR	110	5.5	5.7	177	22.7	11.8	6.8	0.519824	0.299559	-	-	-	-	-	-	-	-	-	-	-	-	-	-	-	-	-	-	-	-	-	-	-	-	-	-	-	-	-
99	48	MALE	MS	IMMUNOMODULATOR	0	1	0.26	224	33.3	14.9	7.3	0.447447	0.219219	-	-	-	-	-	-	-	-	-	-	-	-	-	-	-	-	-	-	-	-	-	-	-	-	-	-	-	-	-
100	45	FEMALE	MS	IMMUNOMODULATOR	3	5.5	4.21	255	34.7	11.2	4.8	0.322767	0.138329	-	-	-	-	-	-	-	-	-	-	-	-	-	-	-	-	-	-	-	-	-	-	-	-	-	-	-	-	-
101	48	FEMALE	MS	IMMUNOMODULATOR	160	6	5.43	219	33.8	12.6	6.3	0.372781	0.186391	-	-	-	-	-	-	-	-	-	-	-	-	-	-	-	-	-	-	-	-	-	-	-	-	-	-	-	-	-
102	44	MALE	MS	IMMUNOMODULATOR	82	6	5.02	333	22.3	8.1	5.8	0.363229	0.26009	-	-	-	-	-	-	-	-	-	-	-	-	-	-	-	-	-	-	-	-	-	-	-	-	-	-	-	-	-
103	38	FEMALE	MS	IMMUNOMODULATOR	48	0	0.35	52	22.1	9.1	7.5	0.411765	0.339367	-	-	-	-	-	-	-	-	-	-	-	-	-	-	-	-	-	-	-	-	-	-	-	-	-	-	-	-	-
104	24	MALE	MS	IMMUNOMODULATOR	0	1	2.44	7	19.7	7.1	4.5	0.360406	0.228426	-	-	-	-	-	-	-	-	-	-	-	-	-	-	-	-	-	-	-	-	-	-	-	-	-	-	-	-	-
105	44	FEMALE	MS	IMMUNOMODULATOR	145	6	5.16	280	44.1	7.8	4.9	0.176871	0.111111	-	-	-	-	-	-	-	-	-	-	-	-	-	-	-	-	-	-	-	-	-	-	-	-	-	-	-	-	-
106	49	FEMALE	MS	IMMUNOSUPPRESSANT	6	5.5	5.51	191	18.5	11.8	5.9	0.637838	0.318919	-	-	-	-	-	-	-	-	-	-	-	-	-	-	-	-	-	-	-	-	-	-	-	-	-	-	-	-	-
107	55	FEMALE	HD	-	-	-	-	-	27.9	4.2	5.1	0.150538	0.182796	56.5	20	25.2	9.9	1.5	8.1	29.7	0.2	7	17.3	3.8	1.3	7	5.2	3.6	8.3	0.1	2.9	2.4	88.6	3	0.03	0.05	0.9	0.1	6.3	3.8	0.2	9.2
108	54	FEMALE	HD	-	-	-	-	-	29.5	5.5	4.7	0.186441	0.159322	41.8	15	19.1	6.6	1	4.8	25.9	0.1	4.8	19.5	7.5	0.7	3.8	7.4	4.4	5.4	0.1	0.8	2.5	84.3	2.3	0.1	0.1	2.5	0.1	10.7	5.8	0.8	12.6
109	29	FEMALE	HD	-	-	-	-	-	22.5	0	3.4	0	0.151111	44.2	28.5	9.8	4.1	1.8	4.8	19.5	0.1	1.3	15.1	6.3	0.1	0.7	8	3.3	4.5	0.2	0.5	2.7	83.1	2.6	0.04	0.1	0.4	0.1	6.4	8	0.5	14.2
110	51	FEMALE	HD	-	-	-	-	-	24.3	0	0	0	0	69.8	54.9	9.7	3.2	2.1	3.2	24.9	0.1	1.2	5.6	3.1	0.2	0.9	1.4	2.3	3.1	0.1	0.4	2.1	88.3	3.8	0.03	0.2	0.6	0.32	3.5	1.8	0.5	9.3
111	45	FEMALE	HD	-	-	-	-	-	22.6	0	4.4	0	0.19469	37.5	19.2	9.9	6.4	2	5.5	18	0.1	1.5	27.5	13.1	3.3	6.9	4.2	3.9	13.2	0.2	3.8	2.5	92	2.7	0.05	0.3	1	0.1	3.5	3.1	0.5	5.8
112	49	FEMALE	HD	-	-	-	-	-	24.4	4.1	4.2	0.168033	0.172131	36.8	14.6	4.5	10	7.8	2.5	14.7	0.3	1.6	12	2.4	0.1	2	7.4	0.7	1.2	0.04	0.2	3.1	80.5	4.3	0.04	0.02	0.8	0.1	19.2	9.1	0.5	16.1
113	53	FEMALE	HD	-	-	-	-	-	30.6	0	3	0	0.0980392	46.8	28.2	9	4.7	4.9	1.5	20.9	0.2	1.5	12.5	5.4	0.6	1.2	5.3	1.7	5.9	0.5	1.4	4.3	88.1	7.4	0.1	0.2	0.4	0.2	8.7	1.8	0.2	8.7
114	38	FEMALE	HD	-	-	-	-	-	24.7	0	0	0	0	39.7	17	10.8	8.4	3.4	2.1	16.5	0.1	1.6	15.2	8.8	0.6	2.1	3.6	0.8	2.5	0.1	0.5	2.7	88.9	3.3	0.1	0.3	0.2	0.1	1.7	2.4	0.4	8.1
115	39	FEMALE	HD	-	-	-	-	-	33.8	5	5.8	0.147929	0.171598	36.4	10.4	14	10.8	1.2	7.9	21.7	0.2	2.1	17.2	6.2	0.8	6.1	4.2	7.1	8.1	0.1	0.4	2.3	85.7	3.5	0.1	0.2	0.4	0.03	15.3	2.8	1.2	12.2
116	52	MALE	HD	-	-	-	-	-	13.8	3.6	1.7	0.26087	0.123188	-	-	-	-	-	-	-	-	-	-	-	-	-	-	-	-	-	-	-	-	-	-	-	-	-	-	-	-	-
117	47	FEMALE	HD	-	-	-	-	-	11.7	3.2	2.3	0.273504	0.196581	-	-	-	-	-	-	-	-	-	-	-	-	-	-	-	-	-	-	-	-	-	-	-	-	-	-	-	-	-
118	52	FEMALE	HD	-	-	-	-	-	13.5	3	1.6	0.222222	0.118519	-	-	-	-	-	-	-	-	-	-	-	-	-	-	-	-	-	-	-	-	-	-	-	-	-	-	-	-	-
119	45	FEMALE	HD	-	-	-	-	-	15.6	3.9	1.8	0.25	0.115385	-	-	-	-	-	-	-	-	-	-	-	-	-	-	-	-	-	-	-	-	-	-	-	-	-	-	-	-	-
120	41	FEMALE	HD	-	-	-	-	-	14.2	3.1	1.7	0.21831	0.119718	-	-	-	-	-	-	-	-	-	-	-	-	-	-	-	-	-	-	-	-	-	-	-	-	-	-	-	-	-
121	34	FEMALE	HD	-	-	-	-	-	18.2	3.8	1.5	0.208791	0.0824176	-	-	-	-	-	-	-	-	-	-	-	-	-	-	-	-	-	-	-	-	-	-	-	-	-	-	-	-	-
122	40	FEMALE	HD	-	-	-	-	-	16.5	4.6	5	0.278788	0.30303	-	-	-	-	-	-	-	-	-	-	-	-	-	-	-	-	-	-	-	-	-	-	-	-	-	-	-	-	-
123	44	FEMALE	HD	-	-	-	-	-	36.7	7.5	6.1	0.20436	0.166213	-	-	-	-	-	-	-	-	-	-	-	-	-	-	-	-	-	-	-	-	-	-	-	-	-	-	-	-	-
124	49	FEMALE	HD	-	-	-	-	-	16	2	0	0.125	0	-	-	-	-	-	-	-	-	-	-	-	-	-	-	-	-	-	-	-	-	-	-	-	-	-	-	-	-	-
125	47	MALE	HD	-	-	-	-	-	19.5	3.7	5.9	0.189744	0.302564	-	-	-	-	-	-	-	-	-	-	-	-	-	-	-	-	-	-	-	-	-	-	-	-	-	-	-	-	-
126	23	FEMALE	HD	-	-	-	-	-	25	6.1	0	0.244	0	32.6	15.2	7.2	8.4	1.8	2.1	17.5	0.3	0.9	13.7	6.1	0.4	2.9	4.2	3	5.3	0.1	0.3	2.1	75.3	1.6	0.1	0.1	0.5	0.02	19.2	5.8	1	19.6
127	45	FEMALE	HD	-	-	-	-	-	22.7	6	0	0.264317	0	28.5	10.1	9.7	6.6	2.1	1.6	15.6	0.3	0.5	12.5	5	0.5	2.3	4.6	1.7	4.6	0.1	0.2	2.3	73.6	2.6	0.3	0.2	0.1	0.1	13.9	5.7	0.9	23.3
128	51	MALE	HD	-	-	-	-	-	22.2	4.4	3.8	0.198198	0.171171	-	-	-	-	-	-	-	-	-	-	-	-	-	-	-	-	-	-	-	-	-	-	-	-	-	-	-	-	-
129	34	FEMALE	HD	-	-	-	-	-	18.7	4.4	2.4	0.235294	0.128342	-	-	-	-	-	-	-	-	-	-	-	-	-	-	-	-	-	-	-	-	-	-	-	-	-	-	-	-	-
130	48	FEMALE	HD	-	-	-	-	-	51.8	2.9	2.3	0.0559846	0.0444015	-	-	-	-	-	-	-	-	-	-	-	-	-	-	-	-	-	-	-	-	-	-	-	-	-	-	-	-	-
131	44	MALE	HD	-	-	-	-	-	9.8	4.3	2.3	0.438776	0.234694	-	-	-	-	-	-	-	-	-	-	-	-	-	-	-	-	-	-	-	-	-	-	-	-	-	-	-	-	-
132	22	MALE	HD	-	-	-	-	-	8.2	2.6	2.7	0.317073	0.329268	-	-	-	-	-	-	-	-	-	-	-	-	-	-	-	-	-	-	-	-	-	-	-	-	-	-	-	-	-
133	38	MALE	HD	-	-	-	-	-	12.8	2.9	3.8	0.226562	0.296875	-	-	-	-	-	-	-	-	-	-	-	-	-	-	-	-	-	-	-	-	-	-	-	-	-	-	-	-	-
134	38	FEMALE	HD	-	-	-	-	-	18.1	6.3	3.7	0.348066	0.20442	51.5	21.3	19.2	9.5	1.5	3.4	33.6	0.2	0.5	17.9	4.5	1.1	4.8	7.4	3.8	9.6	0.1	0.2	2.4	85.7	1.8	0.1	0.1	0.03	0.03	3.6	8.1	0.3	12.4
135	40	FEMALE	HD	-	-	-	-	-	20.5	3.5	4.3	0.170732	0.209756	-	-	-	-	-	-	-	-	-	-	-	-	-	-	-	-	-	-	-	-	-	-	-	-	-	-	-	-	-
136	53	MALE	HD	-	-	-	-	-	10.2	4	5.2	0.392157	0.509804	-	-	-	-	-	-	-	-	-	-	-	-	-	-	-	-	-	-	-	-	-	-	-	-	-	-	-	-	-
137	37	MALE	HD	-	-	-	-	-	14.4	2.7	7.2	0.1875	0.5	-	-	-	-	-	-	-	-	-	-	-	-	-	-	-	-	-	-	-	-	-	-	-	-	-	-	-	-	-
138	42	MALE	HD	-	-	-	-	-	53.5	6	0	0.11215	0	-	-	-	-	-	-	-	-	-	-	-	-	-	-	-	-	-	-	-	-	-	-	-	-	-	-	-	-	-
139	35	FEMALE	HD	-	-	-	-	-	29.6	5.7	0	0.192568	0	-	-	-	-	-	-	-	-	-	-	-	-	-	-	-	-	-	-	-	-	-	-	-	-	-	-	-	-	-
140	43	FEMALE	HD	-	-	-	-	-	29.6	9	0	0.304054	0	-	-	-	-	-	-	-	-	-	-	-	-	-	-	-	-	-	-	-	-	-	-	-	-	-	-	-	-	-
141	41	MALE	HD	-	-	-	-	-	19.1	8.5	4.6	0.445026	0.240838	-	-	-	-	-	-	-	-	-	-	-	-	-	-	-	-	-	-	-	-	-	-	-	-	-	-	-	-	-
142	48	FEMALE	HD	-	-	-	-	-	13	6	4.3	0.461538	0.330769	-	-	-	-	-	-	-	-	-	-	-	-	-	-	-	-	-	-	-	-	-	-	-	-	-	-	-	-	-
143	24	MALE	HD	-	-	-	-	-	11.6	0	1.4	0	0.12069	-	-	-	-	-	-	-	-	-	-	-	-	-	-	-	-	-	-	-	-	-	-	-	-	-	-	-	-	-
144	48	FEMALE	HD	-	-	-	-	-	15.8	7.8	6.2	0.493671	0.392405	-	-	-	-	-	-	-	-	-	-	-	-	-	-	-	-	-	-	-	-	-	-	-	-	-	-	-	-	-
145	53	MALE	HD	-	-	-	-	-	23.5	12.1	5.6	0.514894	0.238298	-	-	-	-	-	-	-	-	-	-	-	-	-	-	-	-	-	-	-	-	-	-	-	-	-	-	-	-	-
146	42	FEMALE	HD	-	-	-	-	-	29.6	7.3	0	0.246622	0	55.1	27.5	16	9.1	2.5	6	22.9	0.2	0.9	10.7	2	0.5	2.7	5.5	6.8	7.5	0.3	0.7	3.6	77.1	1	0.4	0.04	0.2	0.02	5.6	4.8	0.5	20.1
147	43	FEMALE	HD	-	-	-	-	-	31.1	7.1	3.2	0.228296	0.102894	33.7	15.9	8.6	7.3	1.9	6	14.4	0.2	1.1	22.4	5.1	1.2	5.2	10.9	5.4	6.4	0.2	0.5	1.3	76.3	2.6	0.1	0.1	0.9	0.04	8.9	2.4	1	20.1
148	39	FEMALE	HD	-	-	-	-	-	22.8	6.3	4.4	0.276316	0.192982	45.9	26.6	6.1	7.8	5.5	6.9	16.6	0.1	0.9	20.6	5.7	0.3	3.2	11.4	7.4	8.6	0.04	0.2	1.4	84.8	0.9	0.04	0.1	0.4	0.02	9.2	3.1	0.7	13.2
149	41	MALE	HD	-	-	-	-	-	32.9	6.8	5.2	0.206687	0.158055	-	-	-	-	-	-	-	-	-	-	-	-	-	-	-	-	-	-	-	-	-	-	-	-	-	-	-	-	-
